# Supplementary material
Source: PubMed Central journal article supplement (PMC2898444)
Supplement: supp_M109.041707_jbc.M109.041707-1.pdf [file supp_M109.041707_jbc.M109.041707-1.pdf]

**A**

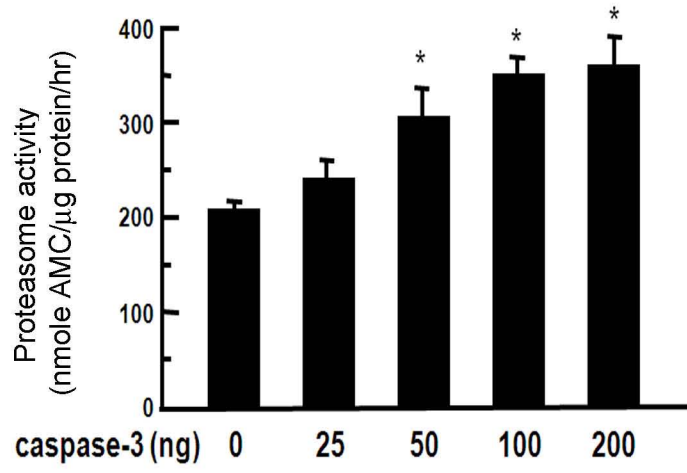

**B**

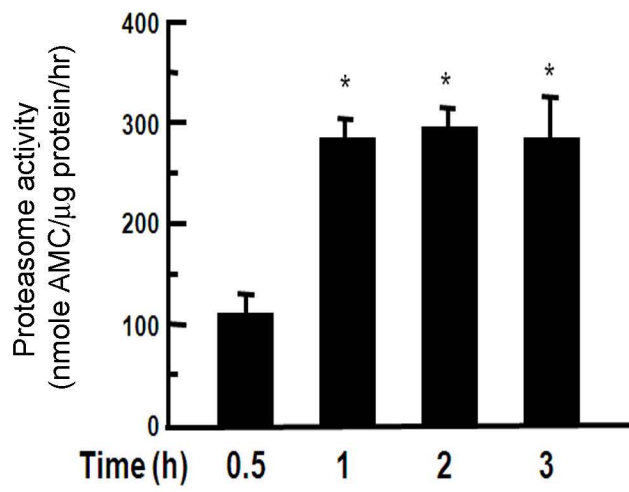

**A**

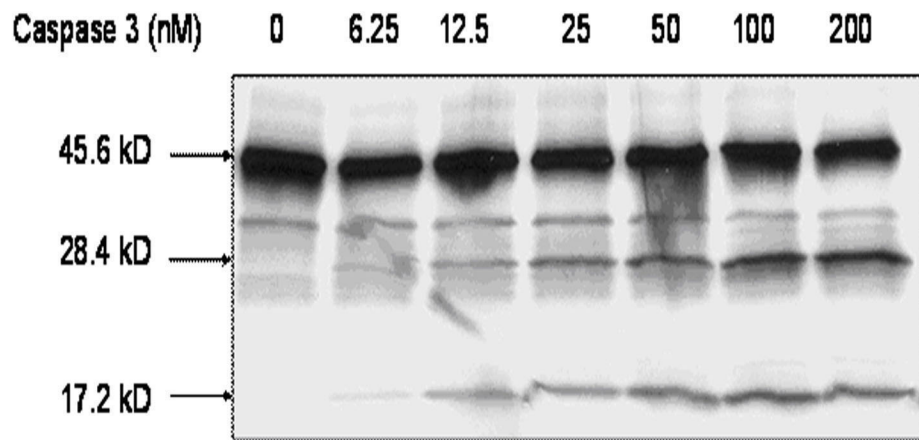

**B**

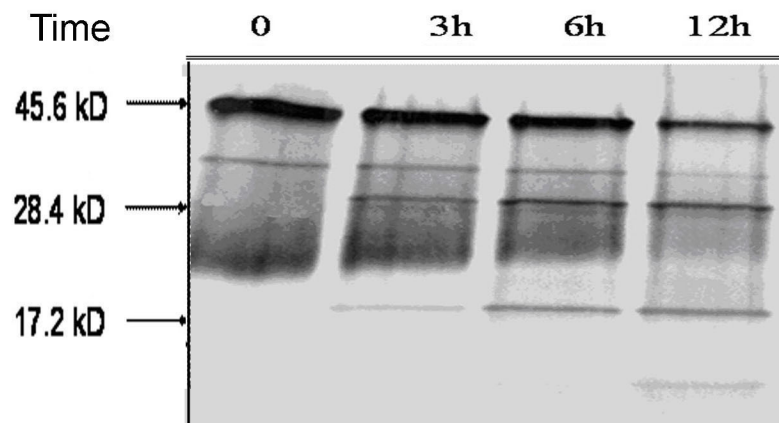

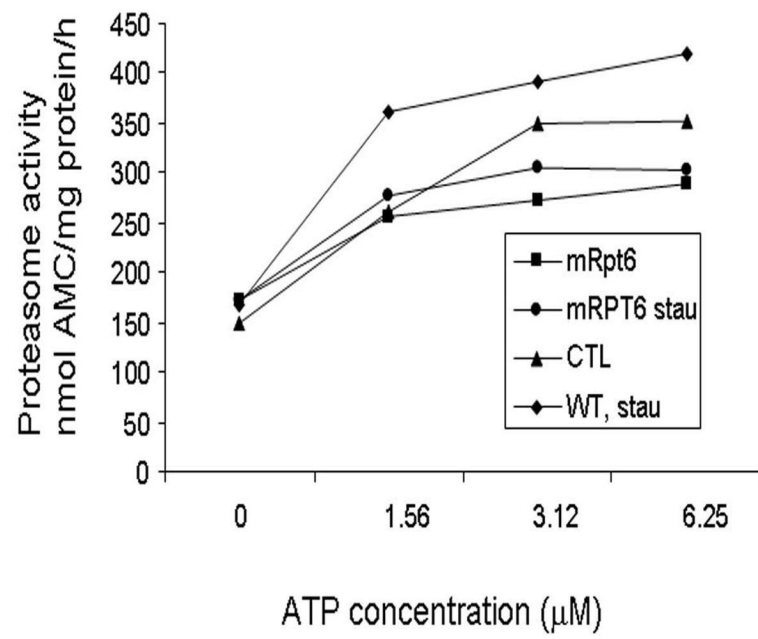

Supplemental Figure 3

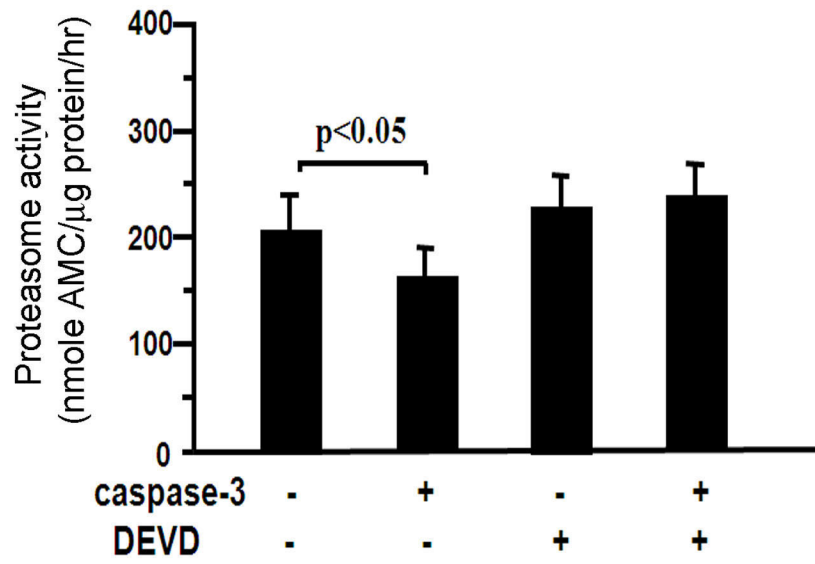

## Supplemental Figure legend:

**Supplemental Figure 1: caspase-3 increases proteasome activity in myotubes in a dose- and time-dependent fashion.** (A) Proteasomes isolated from C2C12 myotubes were incubated for 1h at 37°C with different concentrations of recombinant caspase-3 and proteasome activity was measured as described in Figure 1A. (B) Proteasomes isolated from C2C12 myotubes were incubated with 100 nM caspase-3 for the indicated times and proteasome activity was measured. Results are the mean  $\pm$  S.E. (n = 4 for each concentration and time studied; \*, P<0.05 vs. proteasomes not exposed to caspase-3).

**Supplemental Figure 2: caspase-3 cleaves the proteasome subunit, Rpt 6, in a dose- and time-dependent fashion.** (A) *In vitro* translated proteasome Rpt6 subunits were incubated for 1h at 37°C with different concentrations recombinant caspase-3; subunit cleavage was analyzed by autoradiography as described in Figure 3A. (B) *In vitro* translated Rpt6 was incubated with 100 nM caspase-3 for the indicated times; proteasome cleavage was assessed.

**Supplemental Figure 3: ATP-dependence of changes in proteasome activity.** Proteasomes isolated from wild-type myotubes or myotubes expressing mutant Rpt6 were used to measure proteasome activity during incubation with different concentrations of ATP.

**Supplemental Figure 4: DEVD blocks caspase-3-induced activation of the proteasome.** Proteasomes were isolated from myoblasts and incubated with 100 nM caspase-3 or caspase-3 plus its inhibitor, DEVD-CHO for 1h. Proteasome activity was measured as described in Figure 1A.
